# Supplementary material
Source: PubMed Central journal article supplement (PMC6982592)

## checkCIF/PLATON report

Structure factors have been supplied for datablock(s) Hsu\_HHS465, Hsu\_HHS475, Hsu\_HHS483

THIS REPORT IS FOR GUIDANCE ONLY. IF USED AS PART OF A REVIEW PROCEDURE FOR PUBLICATION, IT SHOULD NOT REPLACE THE EXPERTISE OF AN EXPERIENCED CRYSTALLOGRAPHIC REFEREE.

No syntax errors found.      CIF dictionary      Interpreting this report

### Datablock: Hsu\_HHS465

---

Bond precision:    C-C = 0.0020 A                      Wavelength=0.71073

Cell:                      a=10.5551(15)              b=4.8430(7)              c=12.5583(18)  
                                    alpha=90                      beta=96.404(3)              gamma=90

Temperature:              100 K

|                | Calculated      | Reported        |
|----------------|-----------------|-----------------|
| Volume         | 637.95(16)      | 637.95(16)      |
| Space group    | P 21            | P 1 21 1        |
| Hall group     | P 2yb           | P 2yb           |
| Moiety formula | C12 H10 N4 O3 S | ?               |
| Sum formula    | C12 H10 N4 O3 S | C12 H10 N4 O3 S |
| Mr             | 290.30          | 290.30          |
| Dx,g cm-3      | 1.511           | 1.511           |
| Z              | 2               | 2               |
| Mu (mm-1)      | 0.267           | 0.267           |
| F000           | 300.0           | 300.0           |
| F000'          | 300.37          |                 |
| h,k,lmax       | 15,6,17         | 15,6,17         |
| Nref           | 3881[ 2151]     | 3793            |
| Tmin,Tmax      | 0.921,0.974     | 0.900,0.970     |
| Tmin'          | 0.815           |                 |

Correction method= # Reported T Limits: Tmin=0.900 Tmax=0.970  
AbsCorr = MULTI-SCAN

Data completeness= 1.76/0.98                      Theta(max)= 30.520

R(reflections)= 0.0253( 3656)                      wR2(reflections)= 0.0652( 3793)

S = 1.066                                              Npar= 185

---

The following ALERTS were generated. Each ALERT has the format  
**test-name\_ALERT\_alert-type\_alert-level.**  
Click on the hyperlinks for more details of the test.

---

**Alert level G**

|                                                                    |         |
|--------------------------------------------------------------------|---------|
| PLAT063_ALERT_4_G Crystal Size Likely too Large for Beam Size .... | 0.77 mm |
| PLAT912_ALERT_4_G Missing # of FCF Reflections Above STh/L= 0.600  | 3 Note  |
| PLAT978_ALERT_2_G Number C-C Bonds with Positive Residual Density. | 11 Info |
| PLAT992_ALERT_5_G Repd & Actual _reflns_number_gt Values Differ by | 2 Check |

---

0 **ALERT level A** = Most likely a serious problem - resolve or explain  
0 **ALERT level B** = A potentially serious problem, consider carefully  
0 **ALERT level C** = Check. Ensure it is not caused by an omission or oversight  
4 **ALERT level G** = General information/check it is not something unexpected

0 ALERT type 1 CIF construction/syntax error, inconsistent or missing data  
1 ALERT type 2 Indicator that the structure model may be wrong or deficient  
0 ALERT type 3 Indicator that the structure quality may be low  
2 ALERT type 4 Improvement, methodology, query or suggestion  
1 ALERT type 5 Informative message, check

---

**Datablock: Hsu\_HHS475**

---

Bond precision: C-C = 0.0019 A

Wavelength=0.71073

Cell: a=9.6261(12) b=9.3462(11) c=29.655(4)

alpha=90 beta=90 gamma=90

Temperature: 100 K

|                | Calculated      | Reported        |
|----------------|-----------------|-----------------|
| Volume         | 2668.0(6)       | 2668.0(6)       |
| Space group    | P b c a         | P b c a         |
| Hall group     | -P 2ac 2ab      | -P 2ac 2ab      |
| Moiety formula | C12 H10 N4 O3 S | ?               |
| Sum formula    | C12 H10 N4 O3 S | C12 H10 N4 O3 S |
| Mr             | 290.30          | 290.30          |
| Dx,g cm-3      | 1.446           | 1.445           |
| Z              | 8               | 8               |
| Mu (mm-1)      | 0.256           | 0.256           |
| F000           | 1200.0          | 1200.0          |
| F000'          | 1201.49         |                 |
| h,k,lmax       | 13,12,40        | 13,12,40        |
| Nref           | 3604            | 3604            |
| Tmin,Tmax      | 0.853,0.948     | 0.860,0.950     |
| Tmin'          | 0.853           |                 |

Correction method= # Reported T Limits: Tmin=0.860 Tmax=0.950

AbsCorr = MULTI-SCAN

Data completeness= 1.000

Theta(max)= 29.130

R(reflections)= 0.0387( 3390)

wR2(reflections)= 0.0922( 3604)

S = 1.177

Npar= 185

---

The following ALERTS were generated. Each ALERT has the format  
**test-name\_ALERT\_alert-type\_alert-level**.  
Click on the hyperlinks for more details of the test.

---

**Alert level C**

PLAT906\_ALERT\_3\_C Large K Value in the Analysis of Variance ..... 3.572 Check

---

**Alert level G**

PLAT063\_ALERT\_4\_G Crystal Size Likely too Large for Beam Size .... 0.62 mm  
PLAT066\_ALERT\_1\_G Predicted and Reported Tmin&Tmax Range Identical ? Check  
PLAT978\_ALERT\_2\_G Number C-C Bonds with Positive Residual Density. 9 Info

---

- 0 **ALERT level A** = Most likely a serious problem - resolve or explain  
0 **ALERT level B** = A potentially serious problem, consider carefully  
1 **ALERT level C** = Check. Ensure it is not caused by an omission or oversight  
3 **ALERT level G** = General information/check it is not something unexpected
- 1 ALERT type 1 CIF construction/syntax error, inconsistent or missing data  
1 ALERT type 2 Indicator that the structure model may be wrong or deficient  
1 ALERT type 3 Indicator that the structure quality may be low  
1 ALERT type 4 Improvement, methodology, query or suggestion  
0 ALERT type 5 Informative message, check
- 

## Datablock: Hsu\_HHS483

---

Bond precision: C-C = 0.0064 A

Wavelength=0.71073

Cell: a=33.819(7) b=10.587(2) c=9.6316(18)  
alpha=90 beta=94.564(6) gamma=90

Temperature: 100 K

|                | Calculated        | Reported          |
|----------------|-------------------|-------------------|
| Volume         | 3437.6(12)        | 3437.6(11)        |
| Space group    | C 2/c             | C 2/c             |
| Hall group     | -C 2yc            | -C 2yc            |
| Moiety formula | C18 H13 F N4 O3 S | ?                 |
| Sum formula    | C18 H13 F N4 O3 S | C18 H13 F N4 O3 S |
| Mr             | 384.38            | 384.38            |
| Dx,g cm-3      | 1.485             | 1.485             |
| Z              | 8                 | 8                 |
| Mu (mm-1)      | 0.227             | 0.227             |
| F000           | 1584.0            | 1584.0            |
| F000'          | 1585.74           |                   |
| h,k,lmax       | 41,12,11          | 41,12,11          |
| Nref           | 3309              | 3297              |
| Tmin,Tmax      | 0.927,0.988       | 0.700,0.990       |
| Tmin'          | 0.927             |                   |

Correction method= # Reported T Limits: Tmin=0.700 Tmax=0.990  
AbsCorr = MULTI-SCAN

Data completeness= 0.996                      Theta(max)= 25.820

R(reflections)= 0.0713( 2466)              wR2(reflections)= 0.2032( 3297)

S = 1.092                                      Npar= 248

The following ALERTS were generated. Each ALERT has the format  
**test-name\_ALERT\_alert-type\_alert-level.**  
Click on the hyperlinks for more details of the test.

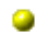

#### Alert level C

|                                                                   |              |
|-------------------------------------------------------------------|--------------|
| PLAT340_ALERT_3_C Low Bond Precision on C-C Bonds .....           | 0.00644 Ang. |
| PLAT480_ALERT_4_C Long H...A H-Bond Reported H1 ..03 .            | 2.66 Ang.    |
| PLAT906_ALERT_3_C Large K Value in the Analysis of Variance ..... | 7.056 Check  |
| PLAT911_ALERT_3_C Missing FCF Refl Between Thmin & STh/L= 0.600   | 3 Report     |

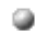

#### Alert level G

|                                                                    |             |
|--------------------------------------------------------------------|-------------|
| PLAT083_ALERT_2_G SHELXL Second Parameter in WGHT Unusually Large  | 24.81 Why ? |
| PLAT910_ALERT_3_G Missing # of FCF Reflection(s) Below Theta(Min). | 1 Note      |
| PLAT912_ALERT_4_G Missing # of FCF Reflections Above STh/L= 0.600  | 6 Note      |
| PLAT933_ALERT_2_G Number of OMIT Records in Embedded .res File ... | 2 Note      |
| PLAT978_ALERT_2_G Number C-C Bonds with Positive Residual Density. | 1 Info      |

- 0 **ALERT level A** = Most likely a serious problem - resolve or explain
- 0 **ALERT level B** = A potentially serious problem, consider carefully
- 4 **ALERT level C** = Check. Ensure it is not caused by an omission or oversight
- 5 **ALERT level G** = General information/check it is not something unexpected

0 ALERT type 1 CIF construction/syntax error, inconsistent or missing data

3 ALERT type 2 Indicator that the structure model may be wrong or deficient  
4 ALERT type 3 Indicator that the structure quality may be low  
2 ALERT type 4 Improvement, methodology, query or suggestion  
0 ALERT type 5 Informative message, check

---

---

It is advisable to attempt to resolve as many as possible of the alerts in all categories. Often the minor alerts point to easily fixed oversights, errors and omissions in your CIF or refinement strategy, so attention to these fine details can be worthwhile. In order to resolve some of the more serious problems it may be necessary to carry out additional measurements or structure refinements. However, the purpose of your study may justify the reported deviations and the more serious of these should normally be commented upon in the discussion or experimental section of a paper or in the "special\_details" fields of the CIF. checkCIF was carefully designed to identify outliers and unusual parameters, but every test has its limitations and alerts that are not important in a particular case may appear. Conversely, the absence of alerts does not guarantee there are no aspects of the results needing attention. It is up to the individual to critically assess their own results and, if necessary, seek expert advice.

### **Publication of your CIF in IUCr journals**

A basic structural check has been run on your CIF. These basic checks will be run on all CIFs submitted for publication in IUCr journals (*Acta Crystallographica*, *Journal of Applied Crystallography*, *Journal of Synchrotron Radiation*); however, if you intend to submit to *Acta Crystallographica Section C* or *E* or *IUCrData*, you should make sure that full publication checks are run on the final version of your CIF prior to submission.

### **Publication of your CIF in other journals**

Please refer to the *Notes for Authors* of the relevant journal for any special instructions relating to CIF submission.

---

**PLATON version of 07/08/2019; check.def file version of 30/07/2019**

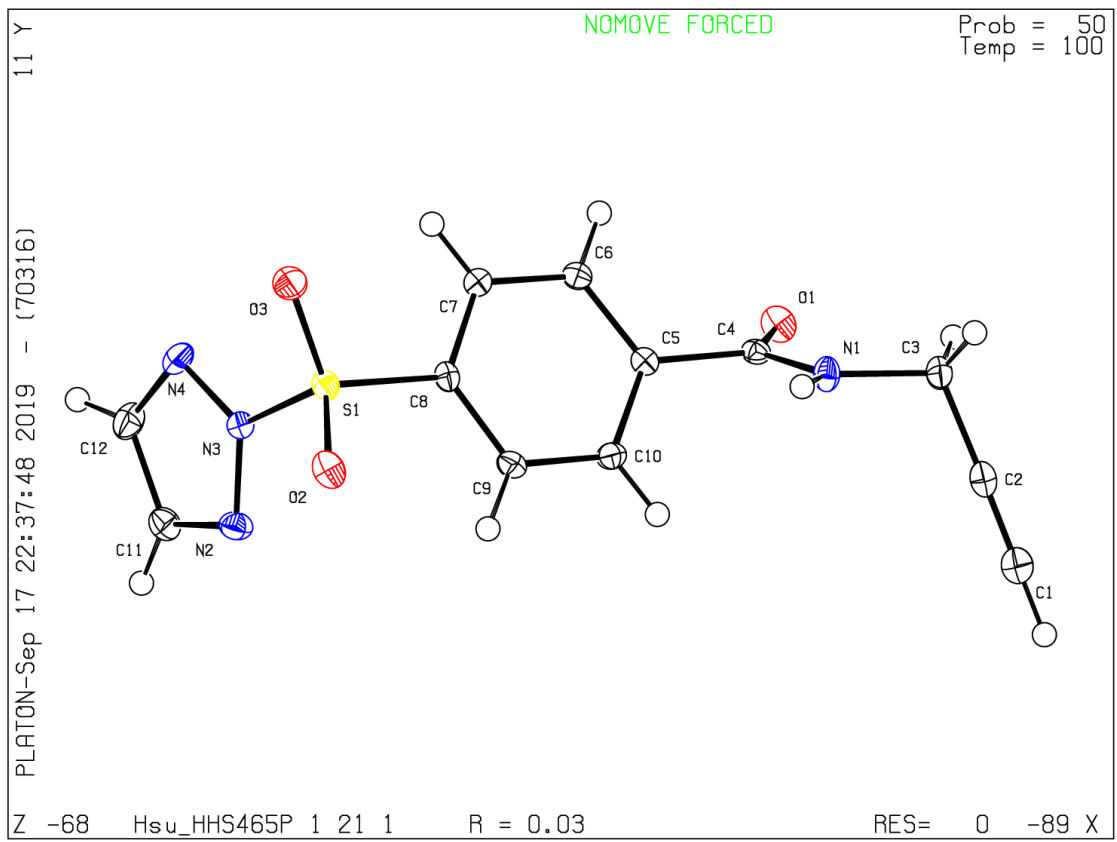

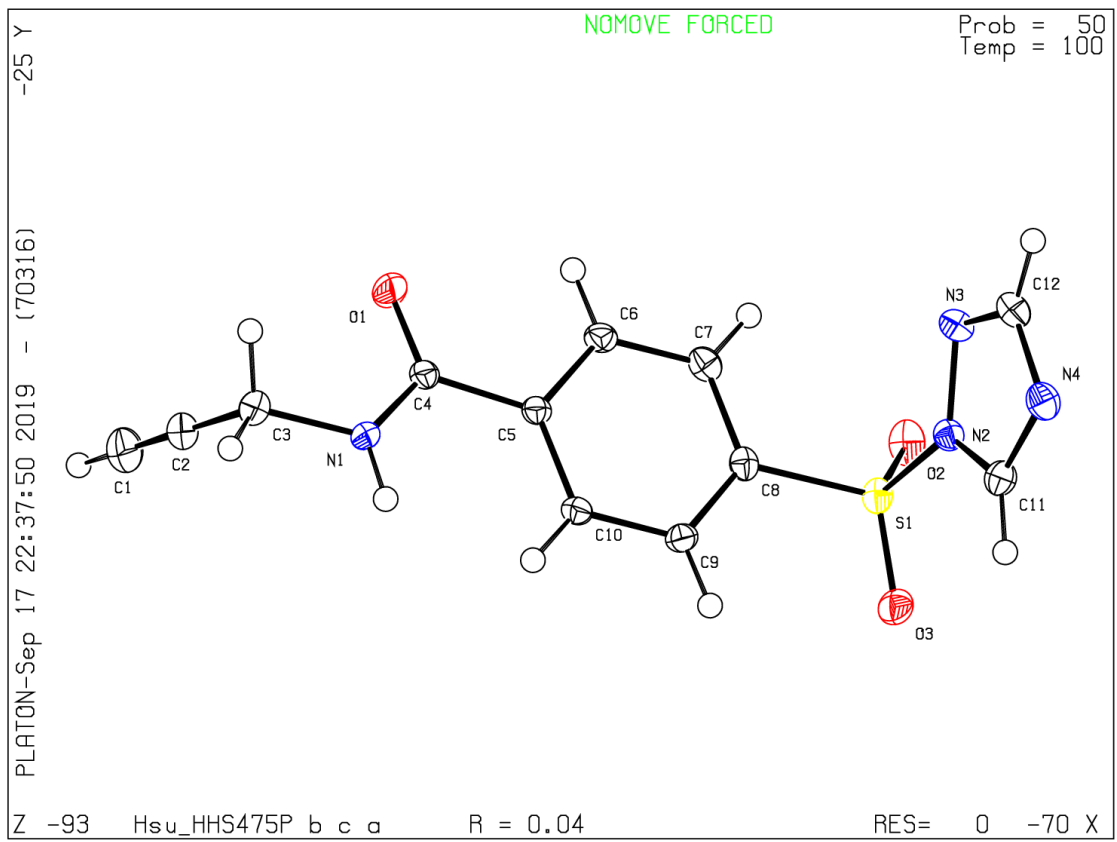

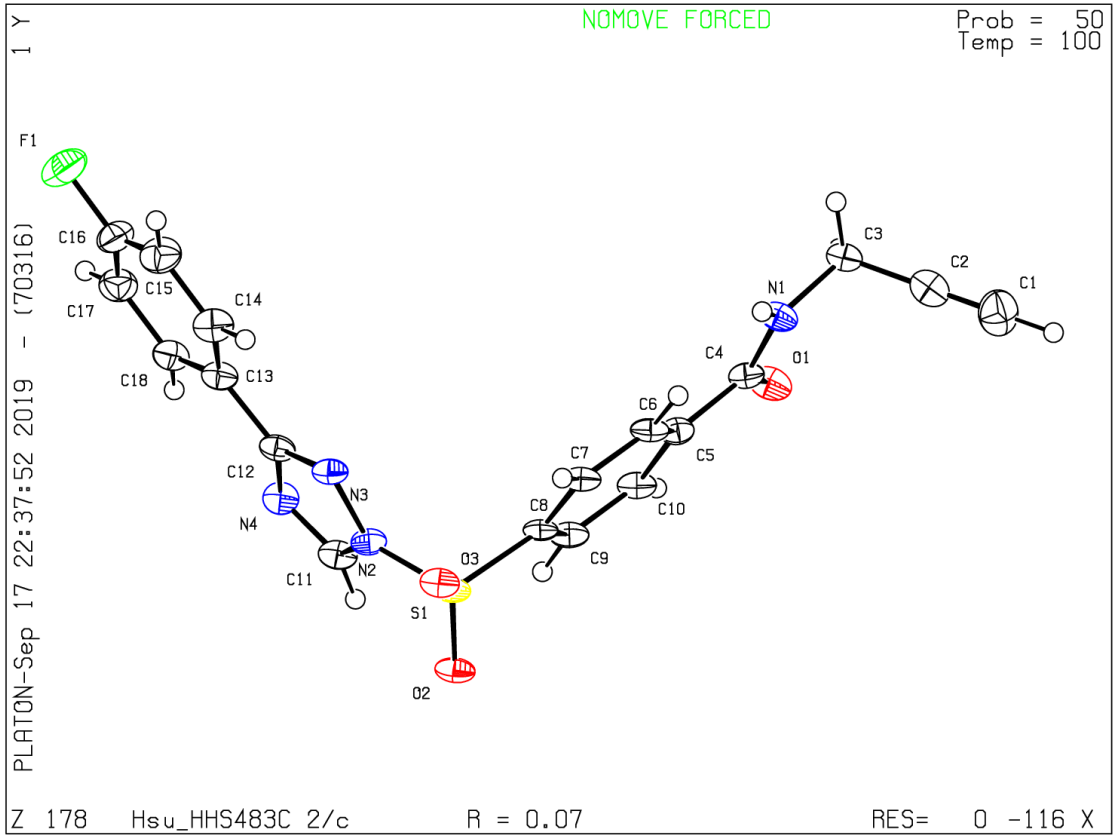

Supplement: NIHMS1541091-supplement-3.pdf [file NIHMS1541091-supplement-3.pdf]
